# Supplementary material for: Global Proteomics Analysis of Lysophosphatidic Acid Signaling in PC-3 Human Prostate Cancer Cells: Role of CCN1
Source: Int J Mol Sci. 2024 Feb 8;25(4):2067. doi: 10.3390/ijms25042067 (PMC10889543; doi:10.3390/ijms25042067)
Supplement: Supplementary file 1 [file ijms-25-02067-s001.zip › ijms-2829195-supplementary.pdf]

**Supplementary Figure S1.**

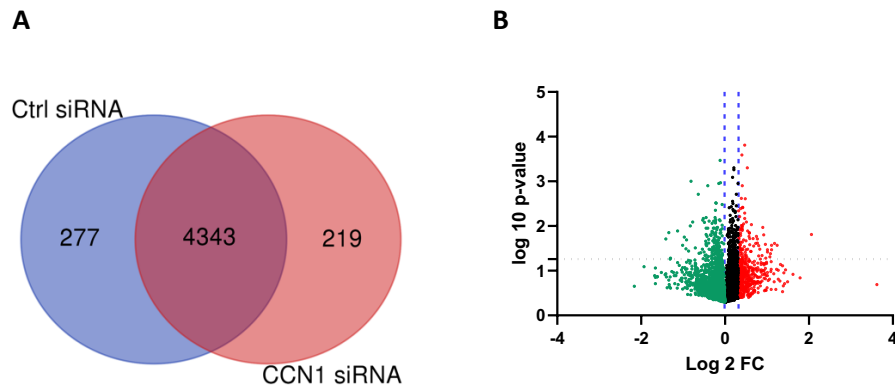

**Supplementary Figure S1. Proteomic differences observed after CCN1 knockdown.** *Panel A:* Venn diagram showing number of proteins detected in the two treatment groups (cells incubated with and without CCN1 siRNA). *Panel B:* Volcano plot showing proteins differentially expressed between cells treated with and without CCN1 siRNA. FC = fold change (treated vs. untreated). Red and green colors indicate proteins up-regulated and down-regulated, respectively, in response to CCN1 knockdown.

### Supplementary Table S1

**Supplementary Table S1.** Proteins significantly up- or down-regulated in cells incubated with CCN1 siRNA.

The top ten proteins with respect to fold change (with CCN1knockdown/without CCN1 knockdown) are listed.

| Genes   | Description                                                                | Fold Change |
|---------|----------------------------------------------------------------------------|-------------|
| UPF2    | Regulator of nonsense transcripts 2                                        | 2.24        |
| AVL9    | Late secretory pathway protein AVL9 homolog                                | 1.04        |
| MAP3K20 | Serine/threonine-protein kinase Chk2                                       | 1.4E-06     |
| MMAB    | Corrinoid adenosyltransferase MMAB                                         | 1.71        |
| SUN2    | SUN domain-containing protein 2                                            | 1.56        |
| ITPA    | Inosine triphosphate pyrophosphatase                                       | 0.57        |
| FRMD8   | FERM domain-containing protein 8                                           | 1.30        |
| RNF13   | E3 ubiquitin-protein ligase RNF13                                          | 1.02        |
| BCR     | Breakpoint cluster region protein                                          | 1.48        |
| MCU     | Calcium uniporter protein, mitochondrial                                   | 1.91        |
| EFR3A   | Protein EFR3 homolog A                                                     | 1.75        |
| TUBB3   | Tubulin beta-3 chain                                                       | 1.28        |
| PEX16   | Peroxisomal membrane protein PEX16                                         | 1.51        |
| TMEM41B | Transmembrane protein 41B                                                  | 1.75        |
| AUP1    | Lipid droplet-regulating VLDL assembly factor AUP1                         | 2.26        |
| GEMIN4  | Gem-associated protein 4                                                   | 1.34        |
| FNTA    | Protein farnesyltransferase/geranylgeranyltransferase type-1 subunit alpha | 0.56        |
| MSMP    | Prostate-associated microseminoprotein                                     | 1.56        |
| RPS27A  | Ubiquitin-ribosomal protein eS31 fusion protein                            | 1.40        |
| CLDN4   | Claudin-4                                                                  | 1.78        |

Supplementary Figure S2.

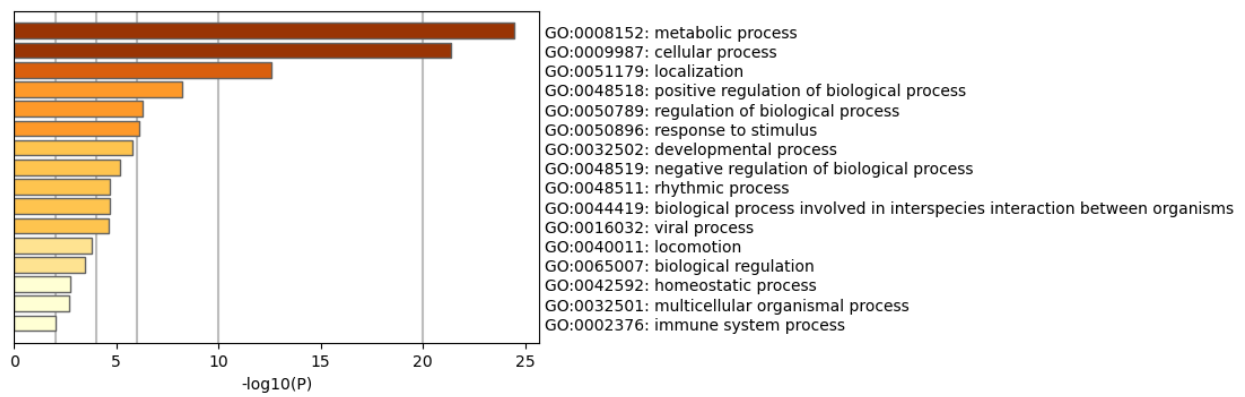

Supplementary Figure S2: Gene ontology (GO) analysis of proteins differentially expressed in response to CCN1 knockdown. Proteins were grouped by biological processes.
